# Supplementary material for: Imaging glial activation in patients with post-treatment Lyme disease symptoms: a pilot study using [11C]DPA-713 PET
Source: Springer Nature journal article supplement (doi:10.1186/s12974-018-1381-4), 2018-12-01

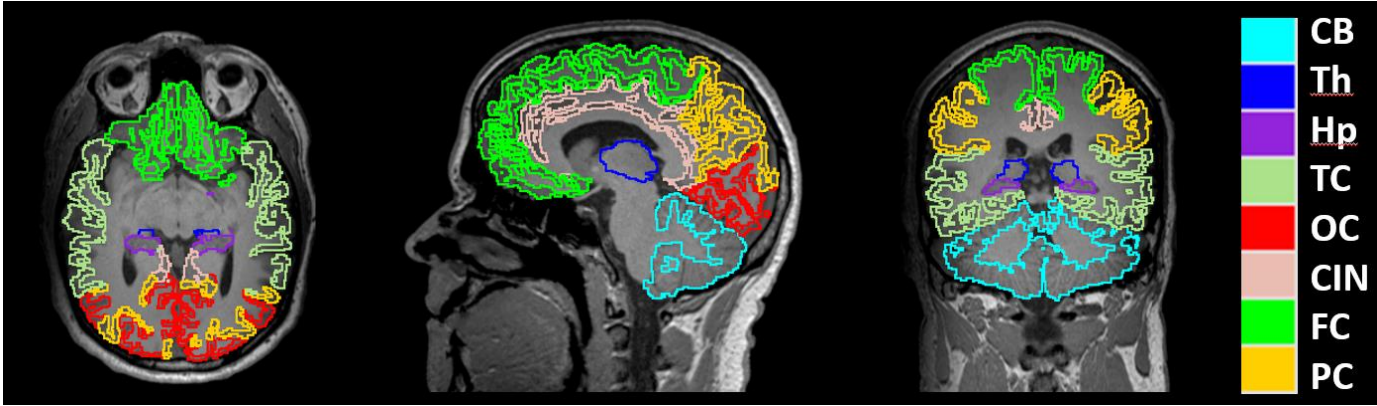

Supplement: MOESM1 [file 16353676]
